# Supplementary material for: Molecular Cloning, Characterization, and Expression of a Receptor for Activated Protein Kinase C1 (RACK1) Gene in Exopalaemon carinicauda Zoea Larvae under Aroclor 1254 Stress
Source: MDPI journal article supplement (doi:10.3390/biology13030174), 2024-03-08
Supplement: s1 [file s1]

**Supplementary Table S1.** Percent identity of *EcRACK1* amino acid sequences compared with other species predicted by Clustal2.1 program.

| Species                         |              | Similarity (%) |        |        |        |        |        |        |        |        |        |        |  |
|---------------------------------|--------------|----------------|--------|--------|--------|--------|--------|--------|--------|--------|--------|--------|--|
| <i>Scylla paramamosain</i>      | 100.00       |                |        |        |        |        |        |        |        |        |        |        |  |
| <i>Exopalaemon</i>              | <b>94.65</b> |                |        |        |        |        |        |        |        |        |        |        |  |
| <i>carinicauda</i>              |              | 100.00         |        |        |        |        |        |        |        |        |        |        |  |
| <i>Penaeus japonicus</i>        | 95.60        | <b>96.86</b>   | 100.00 |        |        |        |        |        |        |        |        |        |  |
| <i>Eriocheir sinensis</i>       | 96.86        | <b>96.54</b>   | 98.11  | 100.00 |        |        |        |        |        |        |        |        |  |
| <i>Pacifastacus leniusculus</i> | 95.91        | <b>96.86</b>   | 97.80  | 98.43  | 100.00 |        |        |        |        |        |        |        |  |
| <i>Drosophila melanogaster</i>  | 79.50        | <b>79.50</b>   | 80.13  | 79.50  | 79.18  | 100.00 |        |        |        |        |        |        |  |
| <i>Bombyx mori</i>              | 82.65        | <b>81.70</b>   | 82.97  | 82.65  | 82.33  | 87.07  | 100.00 |        |        |        |        |        |  |
| <i>Branchiostoma belcheri</i>   | 72.15        | <b>72.78</b>   | 73.10  | 73.10  | 72.78  | 72.47  | 73.42  | 100.00 |        |        |        |        |  |
| <i>Gallus gallus</i>            | 77.92        | <b>77.60</b>   | 78.86  | 78.55  | 77.92  | 76.66  | 78.23  | 81.33  | 100.00 |        |        |        |  |
| <i>Homo sapiens</i>             | 77.92        | <b>77.60</b>   | 78.86  | 78.55  | 77.92  | 76.66  | 78.23  | 81.33  | 100.00 | 100.00 |        |        |  |
| <i>Ruditapes philippinarum</i>  | 77.92        | <b>77.60</b>   | 78.86  | 78.55  | 77.92  | 76.66  | 78.23  | 81.33  | 100.00 | 100.00 | 100.00 |        |  |
| <i>Pocillopora damicornis</i>   | 74.60        | <b>75.24</b>   | 76.19  | 75.56  | 74.92  | 73.33  | 74.29  | 74.92  | 81.90  | 81.90  | 81.90  | 100.00 |  |
